# Supplementary material for: Impaired proteoglycan glycosylation, elevated TGF-β signaling, and abnormal osteoblast differentiation as the basis for bone fragility in a mouse model for gerodermia osteodysplastica
Source: PLoS Genet. 2018 Mar 21;14(3):e1007242. doi: 10.1371/journal.pgen.1007242 (PMC5880397; doi:10.1371/journal.pgen.1007242)
Supplement: S2 Table — (XLSX) [file pgen.1007242.s009.xlsx]

## Sheet: ST2
S2 Table
Primers used for quantitative PCR analysis
Gene Symbol	Sequence
Murine genes
Gapdh	5’-GGGAAGCCCATCACCATCTT-3’
	5’-CGGCCTCACCCCATTTG-3’
Gorab	5’-CGGATGGCTCAGGATTGG-3’
	5’-CGAGTTTTCTTCACAGGAATTCG-3’
Col1a1	5’-TGTTCAGCTTTGTGGACCTC-3’
	5’-TCAAGCATACCTCGGGTTTC-3’
Sp7	5’-GAGGCCTTTCGTCTGCAACT-3’
	5’-TTCTTCTCCCGGGTGTGAGT-3’
Bglap	5’-CCTGGCTGCGCTCTGTCT-3’
	5’-TGCTTGGACATGAAGGCTTTG-3’
Spp1	5’-TGGTGCCTGACCCATCTCA-3’
	5’-TTCATTGGAATTGCTTGGAAGA-3’
Dmp1	5’-TGTCATTCTCCTTGTGTTCCTTTG-3’
	5’-TGTCATTCTCCTTGTGTTCCTTTG-3’
Sost	5’-AGACCTCCCCACCATCCCTAT-3’
	5’-TGTCAGGAAGCGGGTGTAGTG-3’
Cdkn2a	5’-CGCAGGTTCTTGGTCACTG-3’
	5’-TCTGCACCGTAGTTGAGCAG-3’
Cdkn1a	5’-TGACAGATTTCTATCACTCCAAGCG-3’
	5’-CACACAGAGTGAGGGCTAAGGC-3’
Serpine1	5’-GGCACCTTTGAATACTCAGGATGC-3’
	5’-GCTGAAACACTTTTACTCCGAAGTC-3’
Nox4	5’-TGCTGTACAACCAAGGGCCAGA-3’
	5’-ATAAGCCAGGACTGTCCGGCA-3’
Bgn	5'-GACTTGGGTCTGAAGACTGTGC-3'
	5'-ACCAAGACCAGGGCGTAGAGG-3'
Dcn	5'-GTGTCATCTTCGAGTGGTGCAG-3'
	5'-GCCTCTGGACTGATTTTGCTGATC-3'
Human genes
GAPDH	5’-CAATGGATGCCTATACACATGG-3’
	5’-TCAGCTCAGACTCTGTGTTTCC-3’
CDKN2A	5’-CAACGCACCGAATAGTTACG-3’
	5’-ACCAGCGTGTCCAGGAAG-3’
SERPINE1	5’-GAACTTCAGGATGCAGATGTCTC-3’
	5’-CCCATAGGGTGAGAAAACCACGT-3’
NOX4	5’-CCAGAGTATCACTACCTCCACCA-3’
	5’-TCGGAGGTAAGCCAAGAGTGTTC-3’
